# Supplementary material
Source: PubMed Central journal article supplement (PMC10103591)
Supplement: NIHMS1881646-supplement-Supplemental_Material_pdf.pdf [file NIHMS1881646-supplement-Supplemental_Material_pdf.pdf]

# Supporting Information

## Targeted Strategy to Analyze Anti-Epileptic Drugs in Human Serum by LC-MS/MS and LC-ion mobility-MS

Don E. Davis, Jr.,<sup>†</sup> Stacy D. Sherrod,<sup>†</sup> Randi L. Gant-Branum,<sup>†,‡</sup> Jennifer M. Colby,<sup>‡</sup> and John A. McLean<sup>\*,†</sup>

<sup>†</sup>Center for Innovative Technology, Department of Chemistry, Institute of Chemical Biology, Institute for Integrative Biosystems Research and Education, Vanderbilt-Ingram Cancer Center, Vanderbilt University, Nashville, TN 37235 USA

<sup>‡</sup>Department of Pathology, Microbiology, and Immunology; Vanderbilt University Medical Center, Nashville, TN 37235 USA

<sup>\*</sup>Current location: HQ Air Force Drug Testing Laboratory (AFDTL), Lackland Air Force Base, San Antonio, TX, United States.

\*Corresponding Author Email: [john.a.mclean@vanderbilt.edu](mailto:john.a.mclean@vanderbilt.edu)

### *Comments on LC-MS/MS Data, LC-DTIM-MS Data, and samples presented in this work*

In this supporting information, we provide figures for limit of quantitation chromatograms (14 AEDs), patient sample analysis on both analytical platforms, validation studies, and a table for human drug-free 3rd party verified serum quality control material concentrations. We also include additional tables related to linearity study concentrations and calibrator concentrations.

### **Table of Contents**

**P2-8** – Figure S1: Limit of quantitation chromatograms.

**P9** – Figure S2: AED between-day precision (A) and accuracy (B) analyses using LC-MS/MS

**P10** – Figure S3: LC-MS/MS and LC-DTIM-MS patient sample analyses.

**P11** – Figure S4: Anti-Epileptic Drug stability in extracted serum.

**P12** – Figure S5: Anti-Epileptic Drug carry over in extracted serum.

**P13** – Figure S6: Recovery and matrix effects equations

**P14** – Table S1: Third party verified quality control (QC) sample concentrations.

**P15** – Table S2: Linearity study concentrations.

**P16** – Table S3: Calibrator concentrations.

**P17** – Table S4: Parallel analysis of 9 contrived samples.

**Figure S1.** Limit of quantitation (LOQ) chromatograms of 14 AEDs with their given stable isotopically labelled – internal standard (SIL-IS).

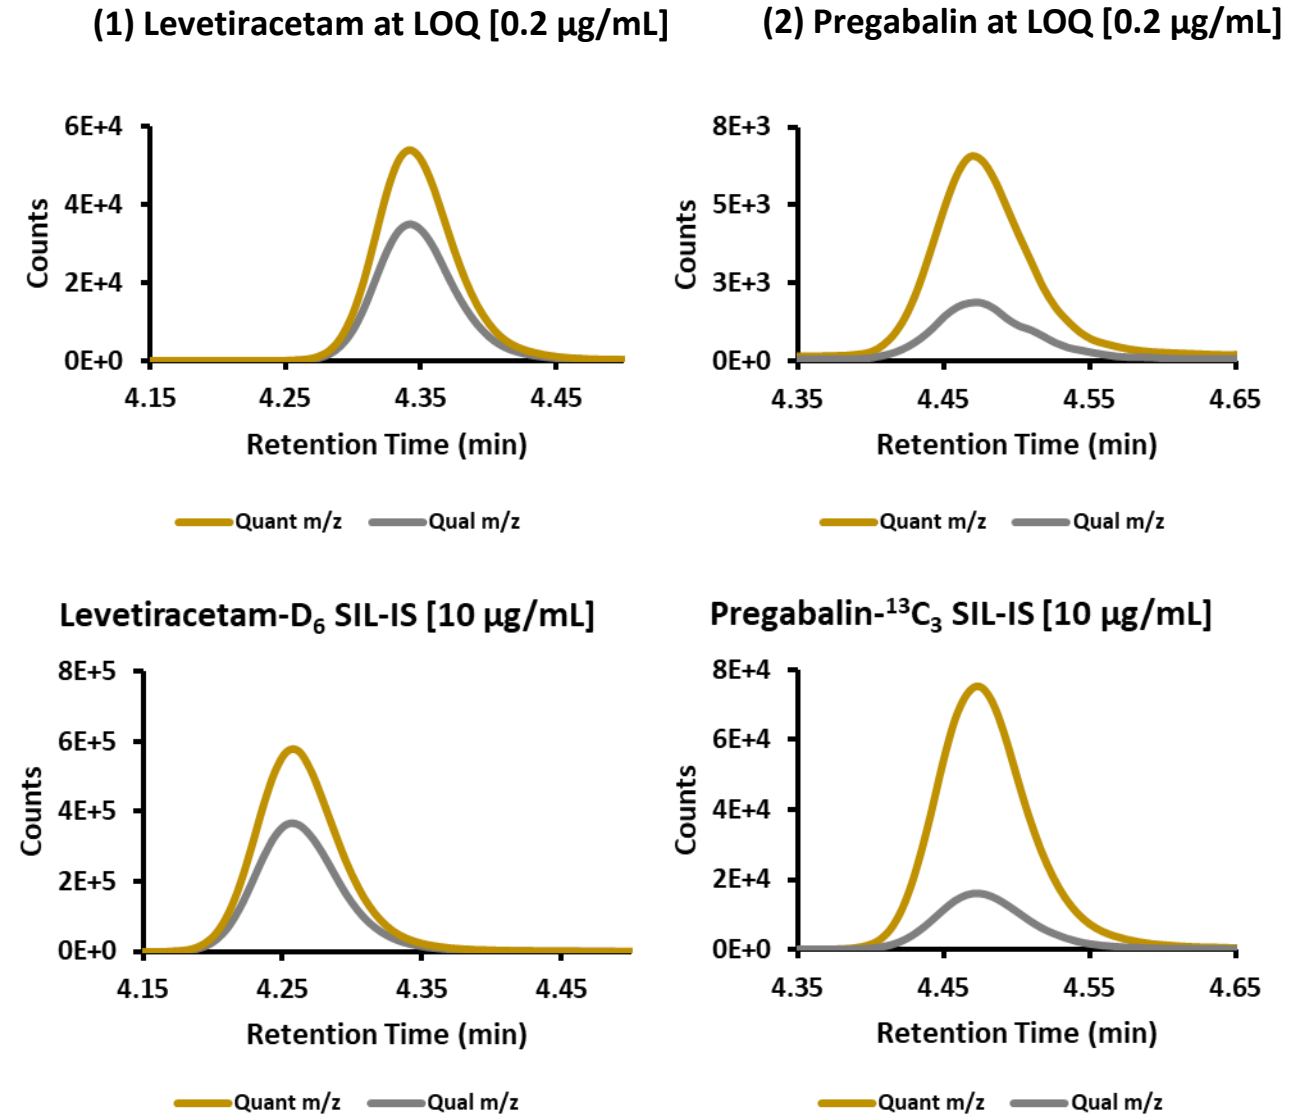

(3) Gabapentin at LOQ [0.2 µg/mL]

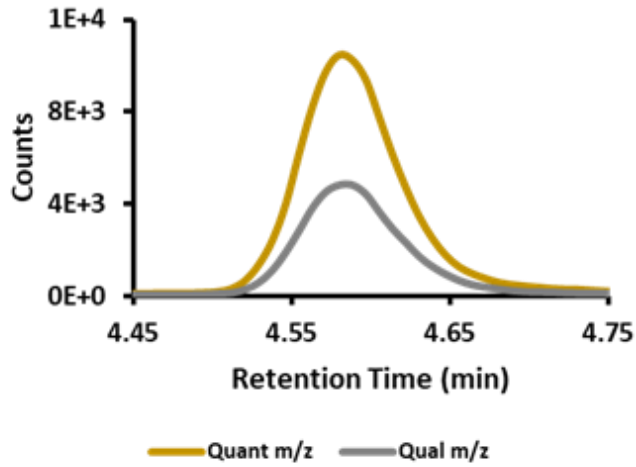

(4) Ethosuximide at LOQ [6.3 µg/mL]

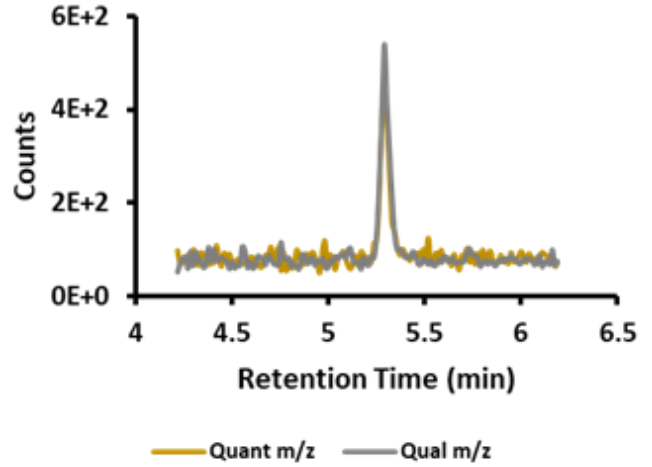

Gabapentin-<sup>13</sup>C<sub>3</sub> SIL-IS [10 µg/mL]

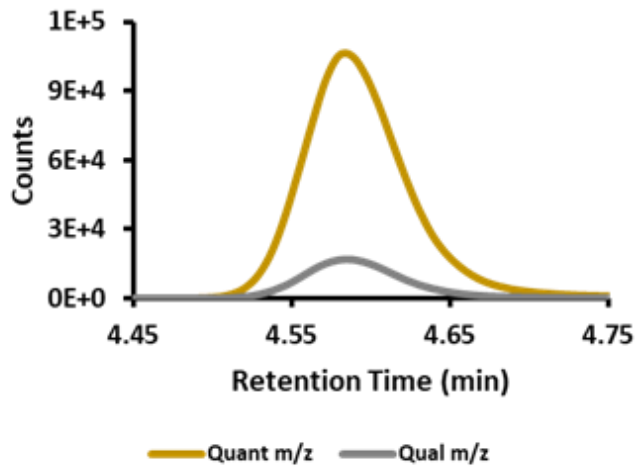

Zonisamide-<sup>13</sup>C<sub>6</sub> SIL-IS [10 µg/mL]

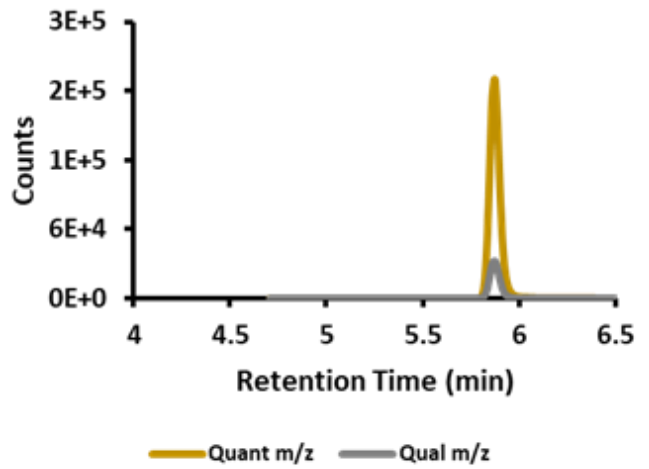

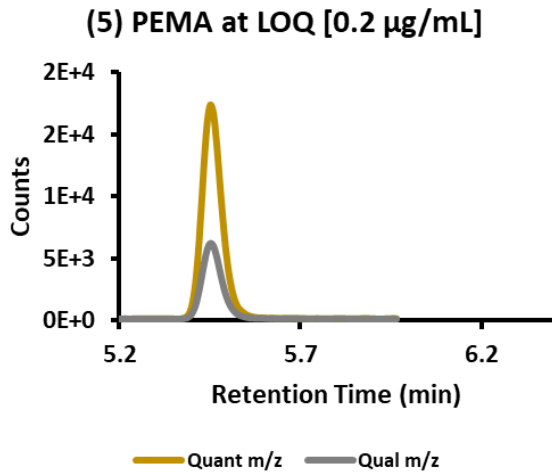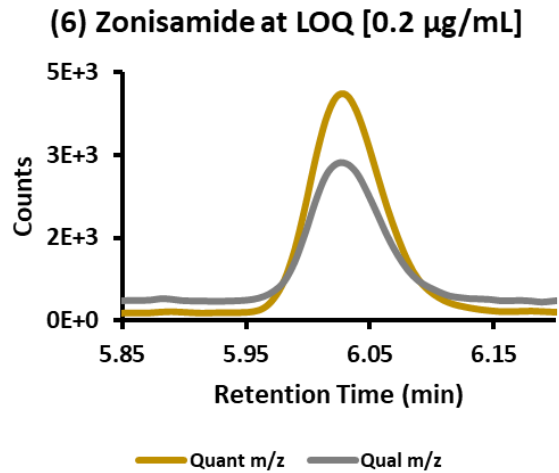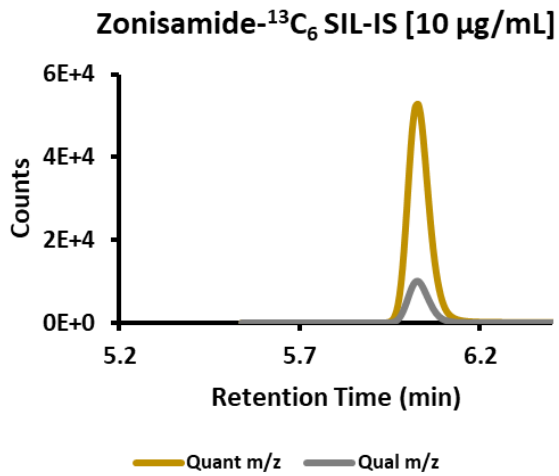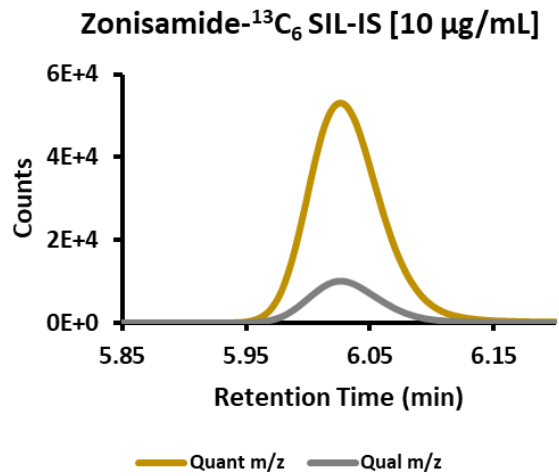

**(7) Primidone at LOQ [0.2 µg/mL]**

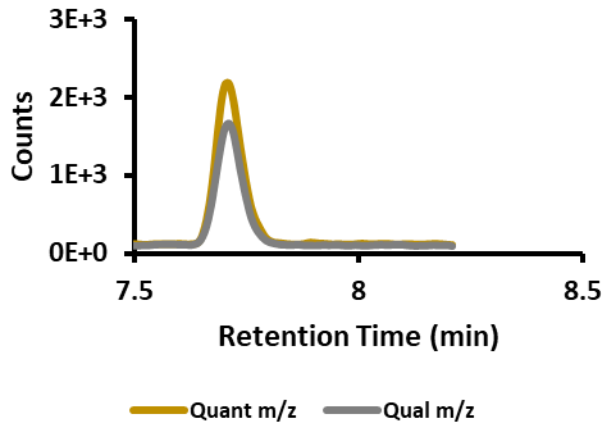

**(8) Lamotrigine at LOQ [0.2 µg/mL]**

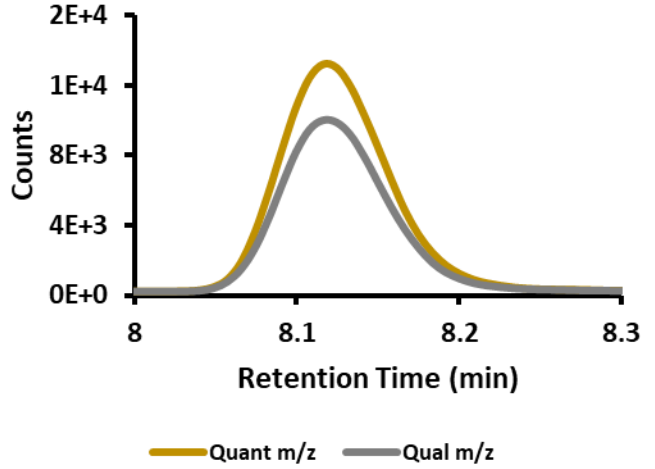

**Lamotrigine-<sup>13</sup>C, <sup>15</sup>N<sub>4</sub> SIL-IS [10 µg/mL]**

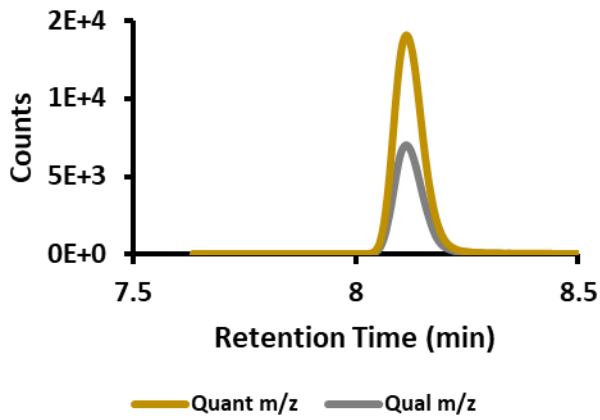

**Lamotrigine-<sup>13</sup>C, <sup>15</sup>N<sub>4</sub> SIL-IS [10 µg/mL]**

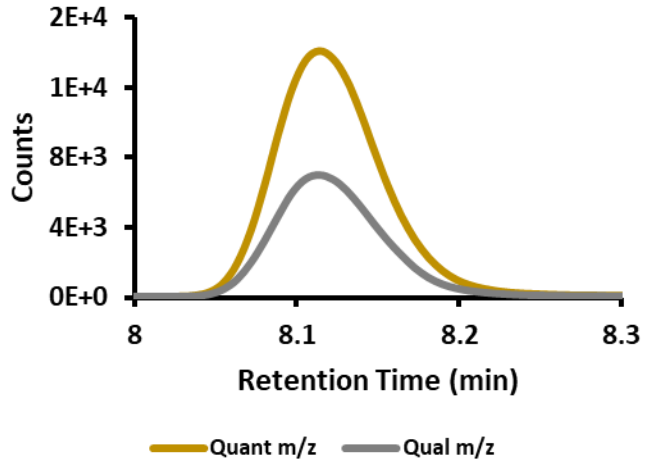

**(9) Topiramate at LOQ [0.4 µg/mL]**

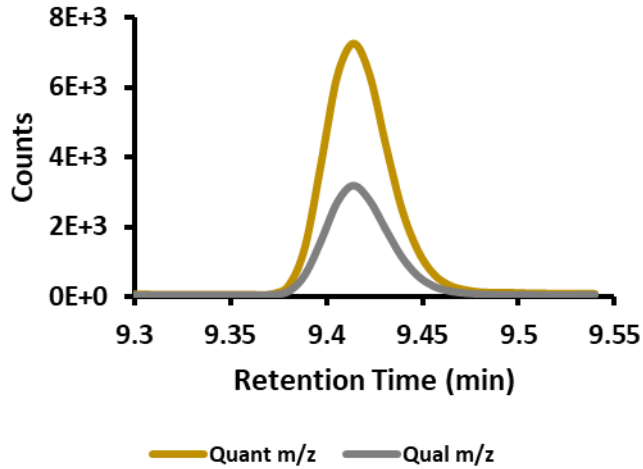

**(10) MHD at LOQ [0.2 µg/mL]**

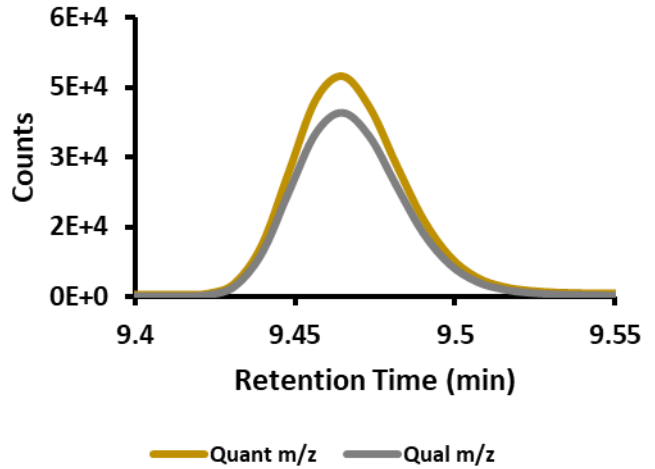

**Topiramate-D<sub>12</sub> SIL-IS [10 µg/mL]**

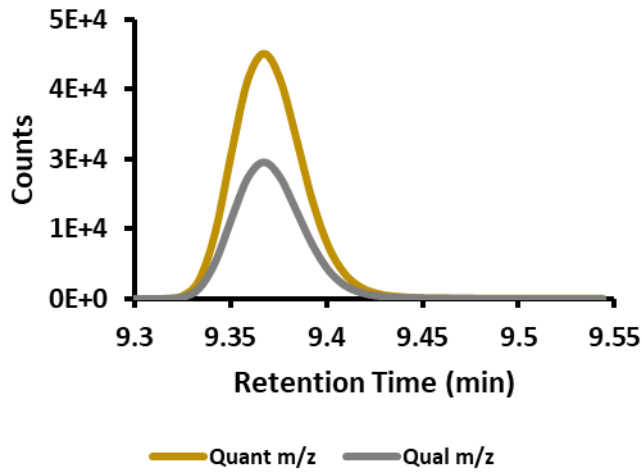

**MHD-<sup>13</sup>C<sub>6</sub> SIL-IS [10 µg/mL]**

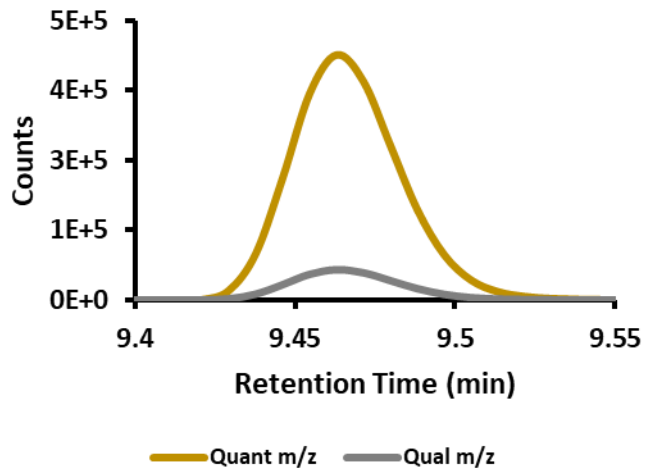

(11) CBZ Epoxy at LOQ [0.1 µg/mL]

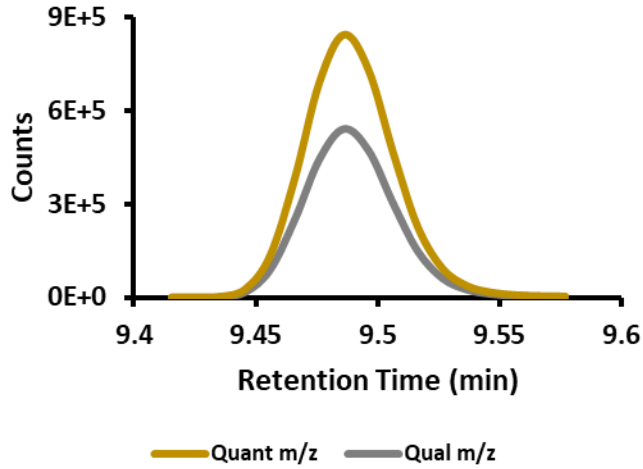

(12) Oxcarbazepine at LOQ [0.7 µg/mL]

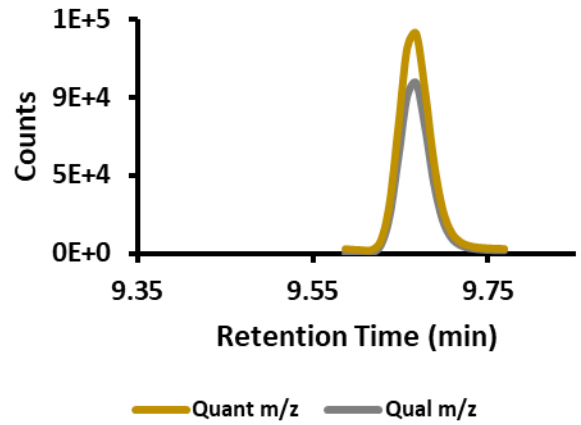

MHD-<sup>13</sup>C<sub>6</sub> SIL-IS [10 µg/mL]

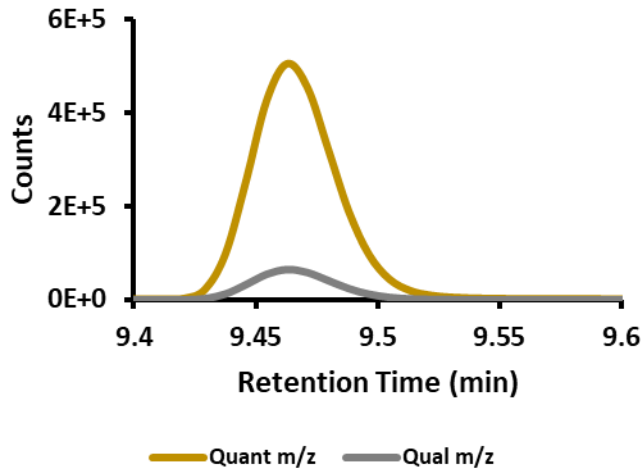

MHD-<sup>13</sup>C<sub>6</sub> SIL-IS [10 µg/mL]

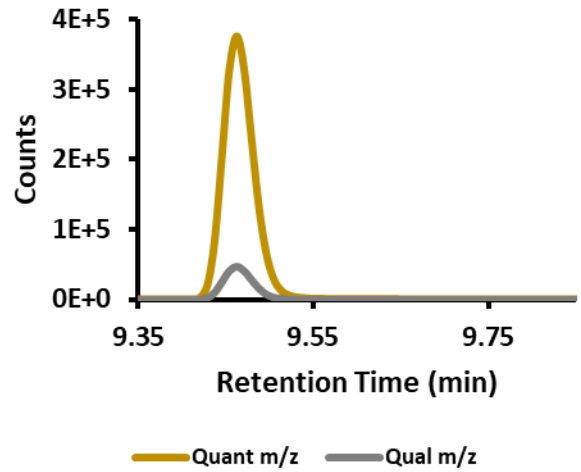

(13) Phenytoin at LOQ [0.8 µg/mL]

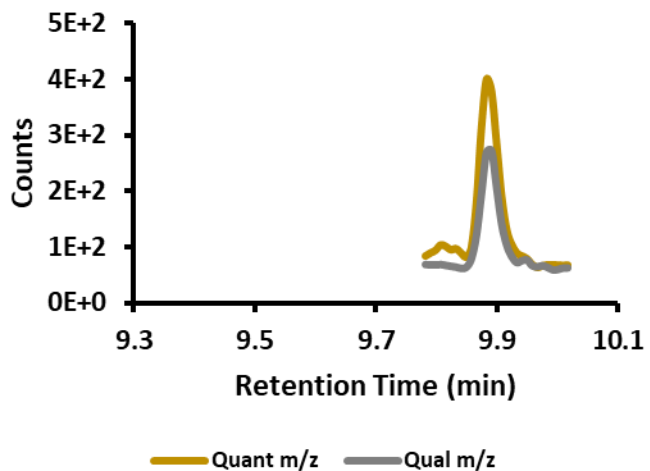

(14) CBZ at LOQ [0.1 µg/mL]

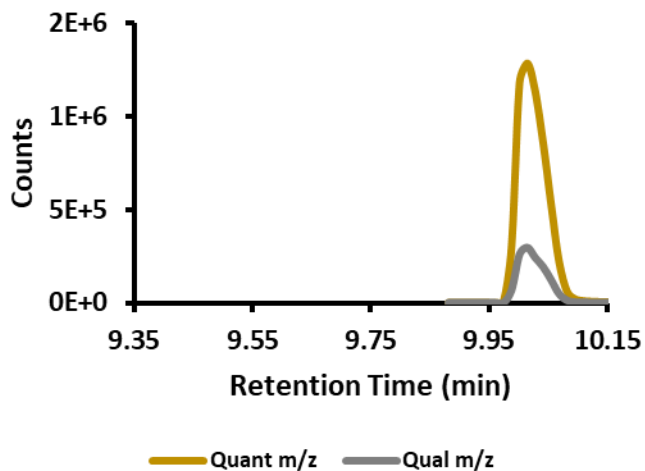

MHD-<sup>13</sup>C<sub>6</sub> SIL-IS [10 µg/mL]

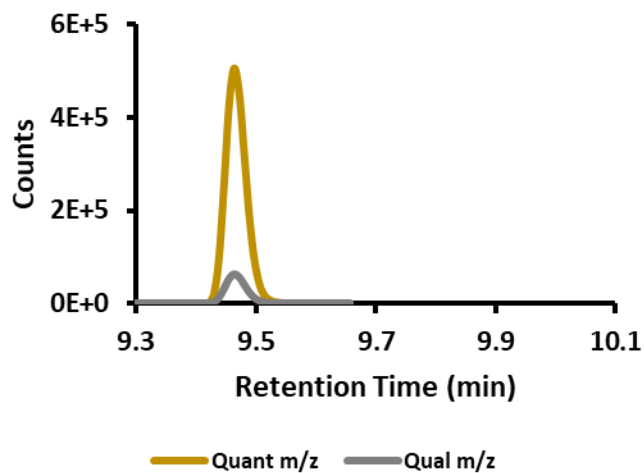

MHD-<sup>13</sup>C<sub>6</sub> SIL-IS [10 µg/mL]

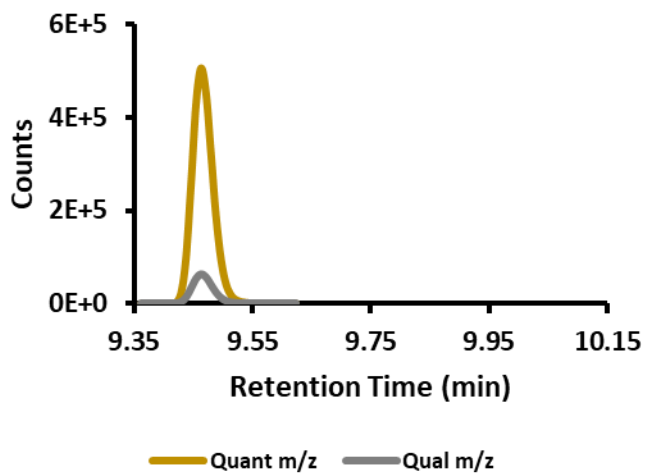



**Figure S2.** AED between-day precision (A) and accuracy (B) analyses using LC-MS/MS. Samples (n = 5 process replicates) were extracted and analyzed on 3 separate days. All data/replicates were combined for statistical analysis (n=15 process replicates). (A) Precision is representative of experimental random error where the low, medium, and high averages for all AEDs were 5%, 3%, and 4%, respectively. The total average %CV for all AEDs was 4%. (B) Accuracy is representative of experimental systematic error where the low, medium, and high averages for all AEDs were 7%, 7%, and 9%, respectively. The total average %bias for all AEDs was 8%. Both random and systematic error is within the margin of error (15% as outlined in the FDA’s bioanalytical method validation guidelines) demonstrating the method’s precision and accuracy.

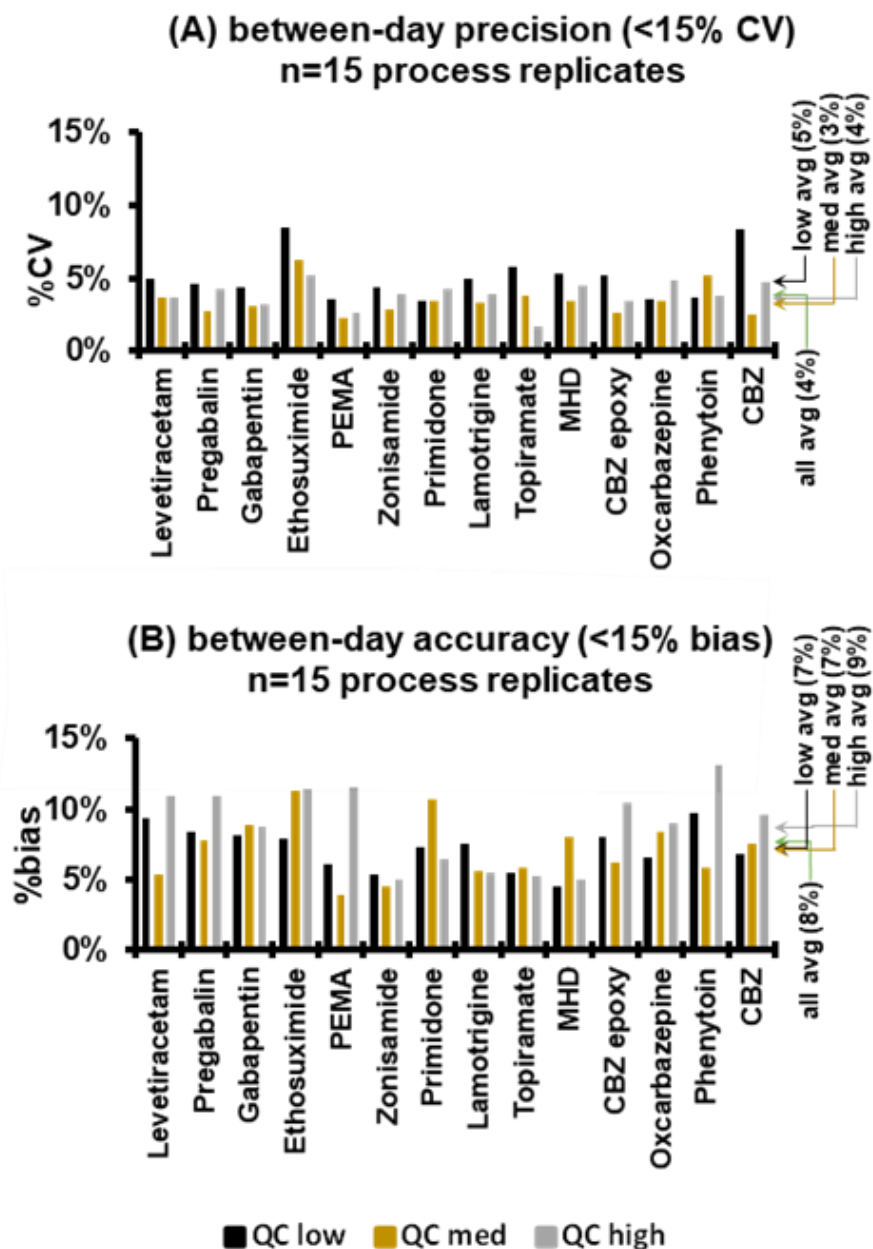

**Figure S3.** (A) This was a blind study whereas the concentrations of the 21 patient samples received from the clinic were not given until LC-MS/MS analysis was finished. All patients underwent polypharmacy with multiple AEDs. LC-UV analysis was compared to LC-MS/MS analysis. (B) As an example of how LC-DTIM-MS increases confidence in identifications, patient samples 3, 9, and 11 was highlighted to show CCS and drift time alignments of levetiracetam, lamotrigine, zonisamide, pregabalin, and MHD where the QCs (n = 3) confirms the identifications of the patient samples (n = 1). Standard error bars were used for QCs to demonstrate overlapping drift times where all 5 AEDs exhibit statistically significant drift times.

**(A) LC-MS/MS patient sample analysis**

| Patient Sample # | AEDs          | LC-UV (µg/mL) | LC-MS/MS (µg/mL) |
|------------------|---------------|---------------|------------------|
| Patient 1        | Lamotrigine   | 12.2          | 10.22            |
|                  | Gabapentin    | NR            | 6.47             |
| Patient 2        | Lamotrigine   | 10.6          | 4.96             |
|                  | Levetiracetam | 32.3          | 20.8             |
| Patient 3        | Lamotrigine   | 5.80          | 4.49             |
|                  | Levetiracetam | NR            | 20.7             |
| Patient 4        | Lamotrigine   | 10.6          | 8.02             |
| Patient 5        | Lamotrigine   | 10.0          | 8.04             |
|                  | Levetiracetam | 61.5          | 71.0             |
| Patient 6        | Lamotrigine   | 14.2          | 8.58             |
|                  | Levetiracetam | 39.8          | 52.1             |
| Patient 7        | Lamotrigine   | 14.2          | 11.7             |
|                  | Levetiracetam | 39.8          | 40.3             |
| Patient 8        | Ethosuximide  | 145           | 134.8            |
|                  | Zonisamide    | 11.0          | 5.94             |
| Patient 9        | Levetiracetam | NR            | 3.2              |
|                  | Pregabalin    | NR            | 1.75             |
|                  | Ethosuximide  | 46.0          | 44.2             |
| Patient 10       | Lamotrigine   | NR            | 5.18             |
|                  | Zonisamide    | 51.0          | 37.9             |
| Patient 11       | Levetiracetam | NR            | 43.9             |
|                  | MHD           | NR            | 19.3             |
| Patient 12       | Lamotrigine   | 11.8          | 6.66             |
| Patient 13       | Lamotrigine   | 8.00          | 5.74             |
|                  | Zonisamide    | 14.0          | 9.20             |
| Patient 14       | Zonisamide    | 10.0          | 6.35             |
|                  | Carbamazepine | 4.00          | 1.53             |
| Patient 15       | MHD           | 24.0          | 20.7             |
|                  | Topiramate    | 17.2          | 22.1             |
| Patient 16       | Levetiracetam | < 3.00        | 23.8             |
| Patient 17       | Lamotrigine   | 32.7          | 22.6             |
|                  | Levetiracetam | 46.4          | 39.7             |
|                  | Lamotrigine   | < 1.00        | < 1.00           |
| Patient 18       | Levetiracetam | 37.7          | 26.7             |
|                  | Gabapentin    | 6.70          | 4.03             |
| Patient 19       | Ethosuximide  | 75.0          | 73.9             |
| Patient 20       | MHD           | 13.0          | 10.5             |
|                  | Gabapentin    | NR            | 1.03             |
| Patient 21       | MHD           | 39.0          | 27.6             |

**(B) LC-DTIM-MS patient sample analysis**

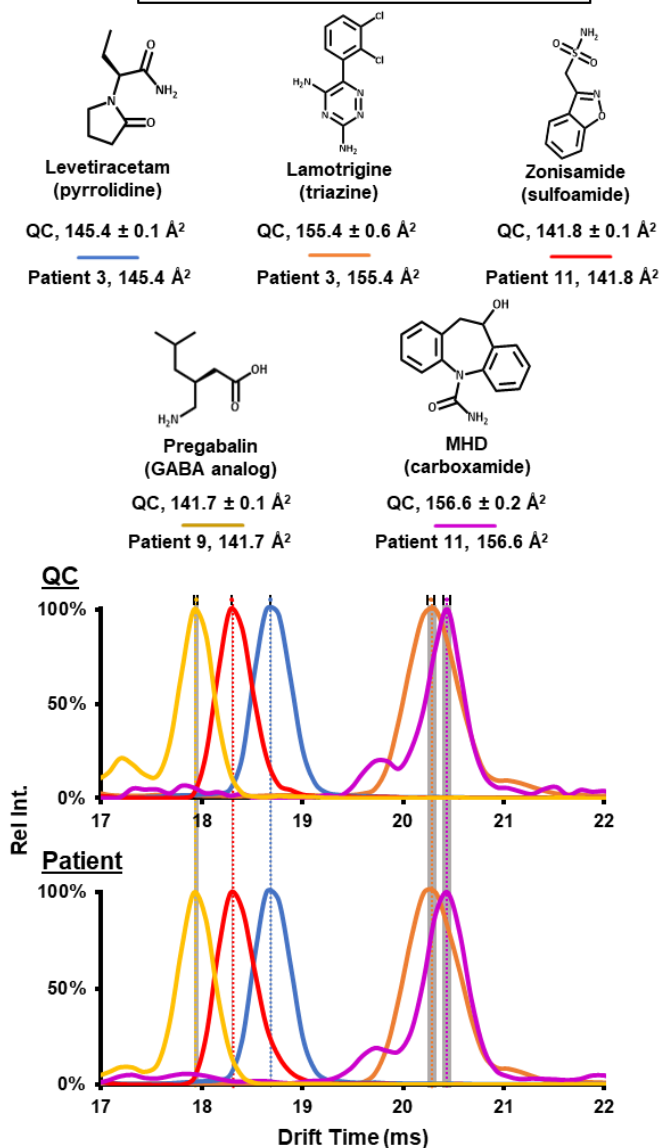

**Figure S4.** Stability of AEDs in extracted serum at 4°C after 48 idle hours in autosampler (n = 3 technical replicates).

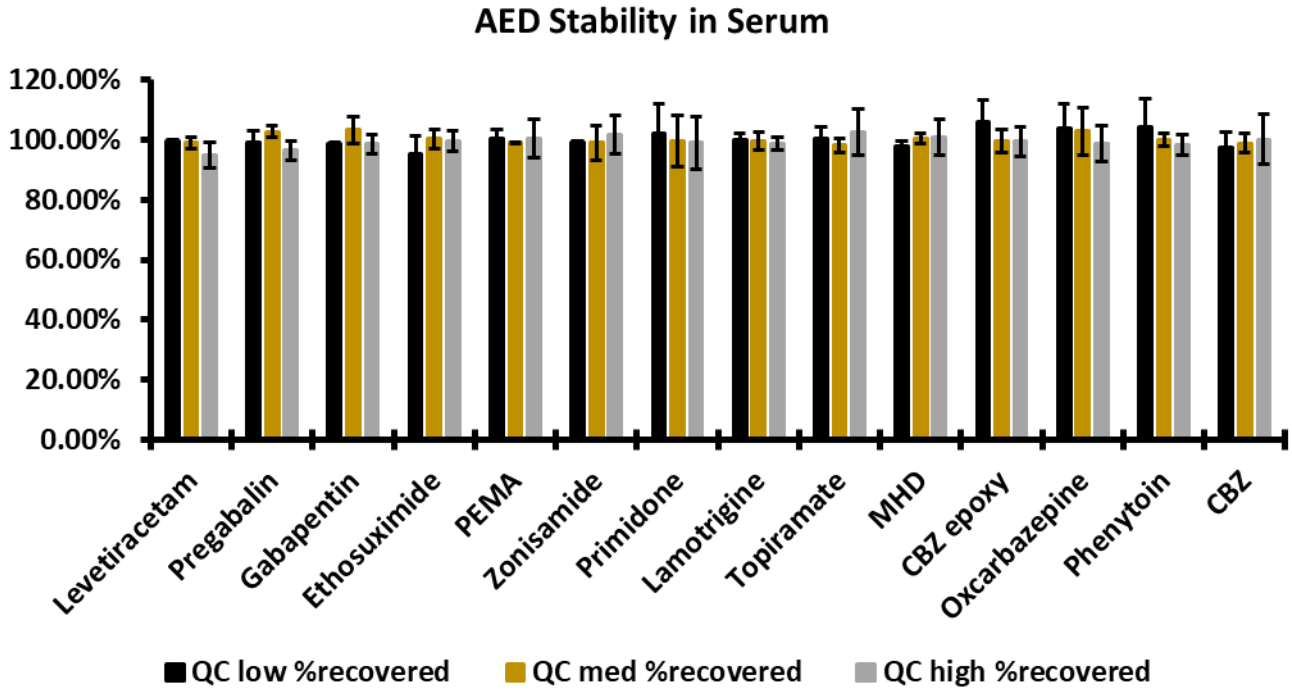

**Figure S5.** Carry over of AEDs in extracted serum (n = 5 technical replicates). Carry over was determined by injecting an extracted negative sample after the QC high sample. The CLSI C62A recommendation is that the carryover limit should be the highest concentration that does not carry over to the negative sample at or above 25% of the QC low sample.<sup>1,2</sup> The FDA recommendation is 20%.<sup>3</sup>

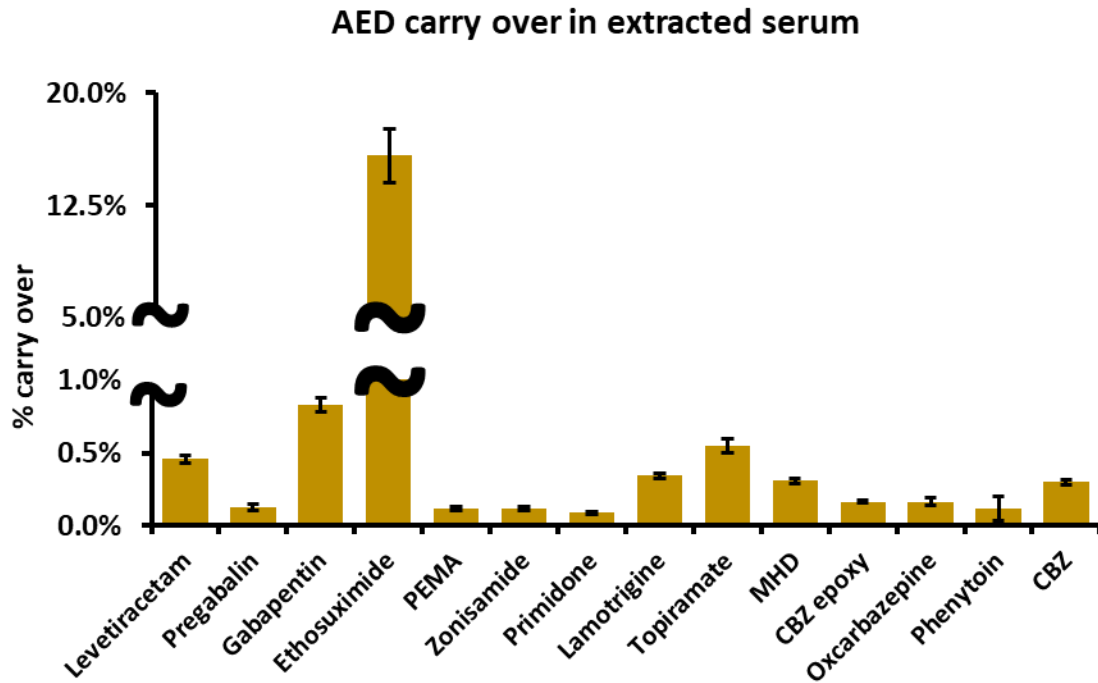

**Figure S6:** Recovery and Matrix Effects Equations.

$$1) \% \text{Recovery} = \frac{\text{Peak Area (spike pre - extraction)}}{\text{Peak Area (spike post - extraction)}} \times 100$$

$$2) \% \text{Matrix effect} = \frac{\text{Peak Area (spike post - extraction)}}{\text{Peak Area (neat)}} \times 100$$

**Table S1.** Serum 3rd party verified quality control (QC) material at low, medium, and high AED concentrations were purchased from UTAK Laboratories Inc, (Valencia, CA, USA).

| AED                   | ( $\mu\text{g/mL}$ ) |        |         |
|-----------------------|----------------------|--------|---------|
|                       | Low QC               | Med QC | High QC |
| Levetiracetam         | 5.00                 | 25.0   | 50.0    |
| Zonisamide            | 5.00                 | 25.0   | 50.0    |
| Topiramate            | 5.00                 | 15.0   | 30.0    |
| Lamotrigine           | 5.00                 | 15.0   | 30.0    |
| MHD                   | 5.00                 | 25.0   | 50.0    |
| Ethosuximide          | 15.0                 | 70.0   | 125     |
| Gabapentin            | 5.00                 | 15.0   | 30.0    |
| Pregabalin            | 5.00                 | 15.0   | 30.0    |
| Primidone             | 5.00                 | 15.0   | 30.0    |
| PEMA                  | 5.00                 | 15.0   | 30.0    |
| Carbamazepine         | 5.00                 | 15.0   | 30.0    |
| Carbamazepine Epoxide | 5.00                 | 15.0   | 30.0    |
| Oxcarbazepine         | 5.00                 | 15.0   | 30.0    |
| Phenytoin             | 5.00                 | 15.0   | 30.0    |

**Table S2.** Linearity study concentrations and correlation coefficients (R<sup>2</sup>). These linearity calibrators were prepared in human drug free serum purchased from UTAK Laboratories Inc, (Valencia, CA, USA).

| AED           | Calibrator Concentration (µg/mL) |      |      |      |      |      |      |      |      |      |      |      | R <sup>2</sup> |
|---------------|----------------------------------|------|------|------|------|------|------|------|------|------|------|------|----------------|
|               | 12                               | 11   | 10   | 9    | 8    | 7    | 6    | 5    | 4    | 3    | 2    | 1    |                |
| Levetiracetam | 200                              | 100  | 50.0 | 25.0 | 12.5 | 6.25 | 3.13 | 1.56 | 0.78 | 0.39 | 0.20 | 0.10 | >0.985         |
| Zonisamide    | 200                              | 100  | 50.0 | 25.0 | 12.5 | 6.25 | 3.13 | 1.56 | 0.78 | 0.39 | 0.20 | 0.10 | >0.985         |
| Topiramate    | 100                              | 50.0 | 25.0 | 12.5 | 6.25 | 3.13 | 1.56 | 0.78 | 0.39 | 0.20 | 0.10 | 0.05 | >0.985         |
| Lamotrigine   | 200                              | 100  | 50.0 | 25.0 | 12.5 | 6.25 | 3.13 | 1.56 | 0.78 | 0.39 | 0.20 | 0.10 | >0.985         |
| MHD           | 200                              | 100  | 50.0 | 25.0 | 12.5 | 6.25 | 3.13 | 1.56 | 0.78 | 0.39 | 0.20 | 0.10 | >0.985         |
| Ethosuximide  | 300                              | 150  | 75.0 | 37.5 | 18.8 | 9.38 | 4.69 | 2.34 | 1.17 | 0.59 | 0.29 | 0.15 | >0.985         |
| Gabapentin    | 200                              | 100  | 50.0 | 25.0 | 12.5 | 6.25 | 3.13 | 1.56 | 0.78 | 0.39 | 0.20 | 0.10 | >0.985         |
| Pregabalin    | 200                              | 100  | 50.0 | 25.0 | 12.5 | 6.25 | 3.13 | 1.56 | 0.78 | 0.39 | 0.20 | 0.10 | >0.985         |
| Primidone     | 100                              | 50.0 | 25.0 | 12.5 | 6.25 | 3.13 | 1.56 | 0.78 | 0.39 | 0.20 | 0.10 | 0.05 | >0.985         |
| PEMA          | 100                              | 50.0 | 25.0 | 12.5 | 6.25 | 3.13 | 1.56 | 0.78 | 0.39 | 0.20 | 0.10 | 0.05 | >0.985         |
| Carbamazepine | 100                              | 50.0 | 25.0 | 12.5 | 6.25 | 3.13 | 1.56 | 0.78 | 0.39 | 0.20 | 0.10 | 0.05 | >0.985         |
| CBZ Epoxy     | 50.0                             | 25.0 | 12.5 | 6.3  | 3.13 | 1.56 | 0.78 | 0.39 | 0.20 | 0.10 | 0.05 | 0.02 | >0.985         |
| Oxcarbazepine | 100                              | 50.0 | 25.0 | 12.5 | 6.25 | 3.13 | 1.56 | 0.78 | 0.39 | 0.20 | 0.10 | 0.05 | >0.985         |
| Phenytoin     | 50.0                             | 25.0 | 12.5 | 6.3  | 3.13 | 1.56 | 0.78 | 0.39 | 0.20 | 0.10 | 0.05 | 0.02 | >0.985         |

**Table S3.** Calibrator concentrations and correlation coefficients ( $R^2$ ). Calibrators are samples used for linearity and/or the calibration curve when analyzing patient samples. These calibrators were prepared in human drug free serum purchased from UTAK Laboratories Inc, (Valencia, CA, USA).

| AED           | Calibrator Concentration ( $\mu\text{g/mL}$ ) |     |    |     |      |     | $R^2$  |
|---------------|-----------------------------------------------|-----|----|-----|------|-----|--------|
|               | 6                                             | 5   | 4  | 3   | 2    | 1   |        |
| Levetiracetam | 60                                            | 30  | 15 | 7.5 | 3.8  | 1.9 | >0.985 |
| Zonisamide    | 60                                            | 30  | 15 | 7.5 | 3.8  | 1.9 | >0.985 |
| Topiramate    | 60                                            | 30  | 15 | 7.5 | 3.8  | 1.9 | >0.985 |
| Lamotrigine   | 60                                            | 30  | 15 | 7.5 | 3.8  | 1.9 | >0.985 |
| MHD           | 60                                            | 30  | 15 | 7.5 | 3.8  | 1.9 | >0.985 |
| Ethosuximide  | 200                                           | 100 | 50 | 25  | 12.5 | 6.3 | >0.985 |
| Gabapentin    | 60                                            | 30  | 15 | 7.5 | 3.8  | 1.9 | >0.985 |
| Pregabalin    | 60                                            | 30  | 15 | 7.5 | 3.8  | 1.9 | >0.985 |
| Primidone     | 60                                            | 30  | 15 | 7.5 | 3.8  | 1.9 | >0.985 |
| PEMA          | 60                                            | 30  | 15 | 7.5 | 3.8  | 1.9 | >0.985 |
| Carbamazepine | 60                                            | 30  | 15 | 7.5 | 3.8  | 1.9 | >0.985 |
| CBZ epoxy     | 60                                            | 30  | 15 | 7.5 | 3.8  | 1.9 | >0.985 |
| Oxcarbazepine | 60                                            | 30  | 15 | 7.5 | 3.8  | 1.9 | >0.985 |
| Phenytoin     | 60                                            | 30  | 15 | 7.5 | 3.8  | 1.9 | >0.985 |



**Table S4.** The developed and validated RPLC-UV method was compared to VUMC's pre-existing RPLC-UV method by parallel analysis of samples. The (-) indicates that the sample was not analyzed for the given AED.

| AED Parallel Samples Sample # | AED           | Expected (µg/mL) | LC - UV (µg/mL) | LC - MS/MS (µg/mL) | LC - UV (%bias) | LC - MS/MS (%bias) |
|-------------------------------|---------------|------------------|-----------------|--------------------|-----------------|--------------------|
| Parallel 1                    | Pregabalin    | 3.00             | -               | 2.50               | -               | -17%               |
|                               | Gabapentin    | 1.00             | -               | 1.18               | -               | 18%                |
| Parallel 2                    | Zonisamide    | 11.0             | 0.00            | 11.0               | -100%           | 0%                 |
|                               | Lamotrigine   | 2.00             | 2.40            | 2.30               | 20%             | 15%                |
|                               | Levetiracetam | 6.00             | 5.80            | 7.00               | -3%             | 17%                |
| Parallel 3                    | MHD           | 9.00             | 9.00            | 8.50               | 0%              | -6%                |
| Parallel 4                    | Pregabalin    | 11.0             | -               | 11.2               | -               | 2%                 |
|                               | Gabapentin    | 15.0             | -               | 13.8               | -               | -8%                |
| Parallel 5                    | Zonisamide    | 26.0             | 26.0            | 25.0               | 0%              | -4%                |
|                               | Lamotrigine   | 11.0             | 11.0            | 11.0               | 0%              | 0%                 |
|                               | Levetiracetam | 22.0             | 22.8            | 25.2               | 4%              | 15%                |
|                               | MHD           | 24.0             | 23.0            | 26.0               | -4%             | 8%                 |
| Parallel 6                    | Pregabalin    | 30.0             | -               | 29.6               | -               | -1%                |
|                               | Gabapentin    | 22.0             | -               | 21.9               | -               | 0%                 |
| Parallel 7                    | Zonisamide    | 50.0             | 50.2            | 52.7               | 0%              | 5%                 |
|                               | Lamotrigine   | 26.0             | 22.7            | 27.3               | -13%            | 5%                 |
|                               | Levetiracetam | 40.0             | 37.1            | 42.0               | -7%             | 5%                 |
| Parallel 8                    | MHD           | 45.0             | 45.0            | 50.0               | 0%              | 11%                |

References:

- (1) Clinical and Laboratory Standards Institute. *Liquid Chromatography-Mass Spectrometry Methods; Approved Guidelines (C62-A)*, No. 616 1-56238-977-7; 2014; pp 1-71
- (2) Viswanathan, C. T.; Bansal, S.; Booth, B.; DeStefano, A. J.; Rose, M. J.; Sailstad, J.; Shah, V. P.; Skelly, J. P.; Swann, P. G.; Weiner, R. Quantitative Bioanalytical Methods Validation and Implementation: Best Practices for Chromatographic and Ligand Binding Assays. *Pharmaceutical Research*. 2007, pp 1962-1973.
- (3) US Food and Drug Administration. *Guidance for Industry: Bioanalytical Method Validation*, No. FDA-2013-D-1020; 2018; pp 1- 619 41.
